# Supplementary material for: Evolution of infectious bronchitis virus in China over the past two decades
Source: PubMed Central journal article supplement (PMC7079583; doi:10.1099/jgv.0.000464), 2016-07
Supplement: jgv-97-1566-s001.pdf [file jgv-97-1566-s001.pdf]

**Supplementary Table 1.** 107 complete genome sequences of infectious bronchitis

virus strains included in the study

| <b>Accession number</b> | <b>Full virus Names</b> | <b>Date isolated</b> | <b>Isolation site</b> | <b>Length (nt)</b> |
|-------------------------|-------------------------|----------------------|-----------------------|--------------------|
| AY851295                | Mass41                  | 1941                 | USA                   | 27475              |
| GU393336                | Holte                   | 1954                 | USA                   | 27247              |
| GU393337                | Iowa 97                 | 1956                 | USA                   | 27663              |
| GU393334                | Gray                    | 1960                 | USA                   | 27622              |
| EU817497                | H52                     | 1960                 | Netherlands           | 27646              |
| FJ888351                | H120                    | 1960                 | Netherlands           | 27652              |
| GU393338                | JMK                     | 1964                 | USA                   | 27515              |
| GU393333                | FL18288                 | 1971                 | USA                   | 27616              |
| GQ504721                | Arkansas Vaccine        | 1981                 | USA                   | 27620              |
| KF377577                | 4/91 vaccine            | 1991                 | UK                    | 27618              |
| GU393331                | Cal56b                  | 1991                 | USA                   | 27663              |
| GU393332                | Delaware 072            | 1992                 | USA                   | 27591              |
| GQ504723                | Georgia 1998 Vaccine    | 1998                 | USA                   | 27620              |
| AY514485                | California 99           | 1999                 | USA                   | 27693              |
| JQ088078                | ck/SWE/0658946/10       | 2010                 | Sweden                | 27664              |
| KF696629                | Connecticut vaccine     | 1951                 | USA                   | 27630              |
| KC008600                | GX-C                    | 1985                 | China                 | 27701              |
| EU526388                | A2                      | 1996                 | Beijing               | 27715              |
| EU714028                | ZJ971                   | 1997                 | Zhejiang              | 27640              |
| DQ646405                | TW2575/98               | 1998                 | Taiwan                | 27710              |
| DQ288927                | SAIBK                   | 2000                 | Sichuan               | 27534              |
| EU714029                | SC021202                | 2002                 | Sichuan               | 27660              |
| AY646283                | partridge/GD/S14/2003   | 2003                 | Guangdong             | 27503              |
| AY641576                | Peafowl/GD/KQ6/2003     | 2003                 | Guangdong             | 27434              |
| AY319651                | BJ                      | 2003                 | Beijing               | 27733              |
| HM245924                | CQ04-1                  | 2004                 | Chongqing             | 27709              |
| JF893452                | YN                      | 2005                 | Yunnan                | 27635              |
| HQ848267                | GX-YL5                  | 2005                 | Guangxi               | 27720              |
| EU637854                | ck/CH/LSD/05I           | 2005                 | Shandong              | 27638              |
| KF663560                | ck/CH/IBWF/2007         | 2007                 | China                 | 27661              |
| JF274479                | ck/CH/LHLJ/07VII        | 2007                 | Heilongjiang          | 27678              |
| HQ850618                | GX-YL9                  | 2007                 | Guangxi               | 27597              |
| HM245923                | DY07                    | 2007                 | Sichuan               | 27675              |
| KJ524708                | SDZB0808                | 2008                 | Shandong              | 27677              |
| KJ425503                | ck/CH/LHLJ/090908       | 2009                 | Heilongjiang          | 27609              |

|          |                   |      |              |       |
|----------|-------------------|------|--------------|-------|
| KJ425504 | ck/CH/LHLJ/091205 | 2009 | Heilongjiang | 27485 |
| KJ425508 | ck/CH/LHN/090909  | 2009 | Henan        | 27641 |
| KF668605 | ck/CH/SD09/005    | 2009 | Shandong     | 27691 |
| KF411041 | ck/CH/LGX/091109  | 2009 | Guangxi      | 27655 |
| JX897900 | GX-NN09032        | 2009 | Guangxi      | 27684 |
| JX195175 | ck/CH/LDL/091022  | 2009 | Dalian       | 27685 |
| JF732903 | Sczy3             | 2009 | Sichuan      | 27695 |
| KP118894 | ck/CH/LGD/090907  | 2009 | Guangdong    | 27685 |
| JF330899 | ck/CH/LNM/091017  | 2009 | Neimenggu    | 27631 |
| JX840411 | YX10              | 2010 | Zhejiang     | 27674 |
| JF828980 | ck/CH/LHLJ/100902 | 2010 | Heilongjiang | 27485 |
| JF828981 | ck/CH/LDL/101212  | 2010 | Dalian       | 27641 |
| JF330898 | ck/CH/LHB/100801  | 2010 | Hebei        | 27675 |
| KP118884 | ck/CH/LSD/110851  | 2011 | Shandong     | 27617 |
| KP118885 | ck/CH/LSD/110857  | 2011 | Shandong     | 27618 |
| KP118886 | ck/CH/LSD/111235  | 2011 | Shandong     | 27686 |
| KP118891 | ck/CH/LHLJ/111246 | 2011 | Heilongjiang | 27618 |
| KP118893 | ck/CH/LSD/110410  | 2011 | Shandong     | 27618 |
| KJ425485 | ck/CH/LDL/110931  | 2011 | Dalian       | 27594 |
| KJ425487 | ck/CH/LHB/110526  | 2011 | Hebei        | 27642 |
| KJ425488 | ck/CH/LHB/110825  | 2011 | Hebei        | 27642 |
| KJ425489 | ck/CH/LHB/111172  | 2011 | Hebei        | 27642 |
| KJ425490 | ck/CH/LHB/111232  | 2011 | Hebei        | 27641 |
| KJ425491 | ck/CH/LHB/111268  | 2011 | Hebei        | 27642 |
| KF411040 | ck/CH/LLN/111169  | 2011 | Liaoning     | 27663 |
| KJ425505 | ck/CH/LHLJ/110310 | 2011 | Heilongjiang | 27642 |
| KJ425506 | ck/CH/LHLJ/111050 | 2011 | Heilongjiang | 27642 |
| KJ425510 | ck/CH/LSD/110505  | 2011 | Shandong     | 27642 |
| KJ425511 | ck/CH/LSD/110529  | 2011 | Shandong     | 27642 |
| KJ425512 | ck/CH/LSD/110726  | 2011 | Shandong     | 27642 |
| KJ435283 | ck/CH/LSD/111219  | 2011 | Shandong     | 27666 |
| KJ435284 | ck/CH/LSD/111241  | 2011 | Shandong     | 27616 |
| KJ435286 | ck/CH/LSD/1112150 | 2011 | Shandong     | 27485 |
| KF663561 | ck/CH/IBYZ/2011   | 2011 | China        | 27673 |
| KC506155 | ck/CH/LJL/111054  | 2011 | Jilin        | 27648 |
| KC136209 | ck/CH/LJL/110302  | 2011 | Jilin        | 27685 |
| JX195176 | ck/CH/LZJ/111113  | 2011 | Zhejiang     | 27683 |
| KJ425486 | ck/CH/LDL/120557  | 2012 | Dalian       | 27644 |
| KJ425492 | ck/CH/LHB/120403  | 2012 | Hebei        | 27642 |
| KJ425493 | ck/CH/LHB/120749  | 2012 | Hebei        | 27642 |

|          |                   |      |              |       |
|----------|-------------------|------|--------------|-------|
| KJ425494 | ck/CH/LHB/121024  | 2012 | Hebei        | 27641 |
| KJ425495 | ck/CH/LHB/121040  | 2012 | Hebei        | 27642 |
| KJ425509 | ck/CH/LJL/121059  | 2012 | Jilin        | 27642 |
| KJ435285 | ck/CH/LSD/121228  | 2012 | Shandong     | 27643 |
| KJ128295 | ck/CH/SD/121220   | 2012 | Shandong     | 27666 |
| KF663559 | ck/CH/IBTZ/2012   | 2012 | China        | 27700 |
| KF574761 | SDIB821/2012      | 2012 | Shandong     | 27677 |
| KC013541 | ck/CH/LGD/120723  | 2012 | China        | 27718 |
| KC119407 | ck/CH/LGD/120724  | 2012 | China        | 27718 |
| KP036503 | ck/CH/LHB/121010  | 2012 | Hebei        | 27613 |
| KP118883 | ck/CH/LHB/121041  | 2012 | Hebei        | 27615 |
| KP118888 | ck/CH/LLN/130102  | 2013 | Liaoning     | 27617 |
| KP118889 | ck/CH/LHB/130575  | 2013 | Hebei        | 27682 |
| KP118890 | ck/CH/LHB/130578  | 2013 | Hebei        | 27682 |
| KP118892 | ck/CH/LLN/130101  | 2013 | Liaoning     | 27594 |
| KM213963 | ck/CH/XDC-2/2013  | 2013 | China        | 27714 |
| KJ425496 | ck/CH/LHB/130573  | 2013 | Hebei        | 27606 |
| KJ425497 | ck/CH/LHB/130598  | 2013 | Hebei        | 27621 |
| KJ425498 | ck/CH/LHB/130642  | 2013 | Hebei        | 27642 |
| KJ425499 | ck/CH/LHB/131118  | 2013 | Hebei        | 27642 |
| KJ425500 | ck/CH/LHB/131132  | 2013 | Hebei        | 27644 |
| KJ425501 | ck/CH/LHB/131142  | 2013 | Hebei        | 27642 |
| KJ425502 | ck/CH/LHB/131143  | 2013 | Hebei        | 27642 |
| KJ425507 | ck/CH/LHLJ/131216 | 2013 | Heilongjiang | 27642 |
| KM213963 | ck/CH/XDC-2/2013  | 2013 | China        | 27714 |
| KP036504 | ck/CH/LHB/130630  | 2013 | Hebei        | 27617 |
| KP036505 | ck/CH/LJL/130925  | 2013 | Jilin        | 27676 |
| KP118880 | ck/CH/LHB/130927  | 2013 | Hebei        | 27618 |
| KP118887 | ck/CH/LHB/140532  | 2014 | Hebei        | 27621 |
| KP036502 | ck/CH/LHLJ/140906 | 2014 | Heilongjiang | 27611 |
| KP118881 | ck/CH/LBJ/140413  | 2014 | Beijing      | 27618 |
| KP118882 | ck/CH/LBJ/140402  | 2014 | Beijing      | 27618 |

Accession numbers are from GenBank. “China” is listed where no specific site is known. Chinese sites are province or city names. USA, United States of America; UK, United Kingdom. M41, H52, H120, Arkansas Vaccine, 4/91 vaccine, Georgia 1998 Vaccine and Connecticut vaccine are all attenuated strains.

**Supplementary Table 2.** 1022 S1 sequences of infectious bronchitis virus strains

included in the study

| Accession number | Full virus Names | Accession number | Full virus Names       |
|------------------|------------------|------------------|------------------------|
| KJ873875         | HN_LH            | KJ524616         | ck/CH/GX/GL12-2        |
| KJ524580         | ck/CH/GD/LZ11    | KJ524617         | ck/CH/YN/SL11-1        |
| KJ524581         | ck/CH/GD/HY11    | KJ524618         | ck/CH/YN/SL11-2        |
| KJ524582         | ck/CH/GX/NN11-1  | KJ524619         | ck/CH/GX/GL12-3        |
| KJ524583         | ck/CH/GX/NN11-2  | KJ524620         | ck/CH/YN/SL12-1        |
| KJ524584         | ck/CH/GX/GL11-1  | KJ524621         | ck/CH/ZJ/HZ12          |
| KJ524585         | ck/CH/GX/GL11-2  | KJ524622         | K/CH/SC/DY12-3         |
| KJ524586         | ck/CH/FJ/PT11    | KJ524623         | ck/CH/GX/NN12-1        |
| KJ524587         | ck/CH/JS/YC11-1  | KJ524624         | ck/CH/GX/ZS12          |
| KJ524588         | ck/CH/JS/YC11-2  | KJ524625         | ck/CH/HuN/NX12         |
| KJ524589         | ck/CH/HuB/HC11   | KJ524626         | ck/CH/SC/MS12-1        |
| KJ524590         | ck/CH/GD/YN11    | KJ524627         | ck/CH/SC/MS12-2        |
| KJ524591         | ck/CH/GD/LD11    | KJ524628         | ck/CH/JS/LYG12         |
| KJ524592         | ck/CH/GD/CG11    | KJ524629         | ck/CH/HuB/HC12         |
| KJ524593         | ck/CH/SC/MS11-1  | KJ524630         | ck/CH/FJ/ZZ12          |
| KJ524594         | ck/CH/SC/MS11-2  | KJ524631         | ck/CH/YN/SL12-2        |
| KJ524595         | ck/CH/SC/ZJ11    | KJ524632         | ck/CH/YN/SL12          |
| KJ524596         | ck/CH/GX/LC11-1  | KJ524633         | ck/CH/YN/SL12-4        |
| KJ524597         | ck/CH/GX/LC11-2  | KJ524634         | ck/CH/GX/NN12-2        |
| KJ524598         | ck/CH/GX/LC11-3  | KJ524635         | ck/CH/GX/GL12-4        |
| KJ524599         | ck/CH/GX/NN11-3  | KJ524636         | ck/CH/YN/SL12-3        |
| KJ524600         | ck/CH/SC/MS11-3  | KJ524637         | ck/CH/HuB/XN11         |
| KJ524601         | ck/CH/SC/MS11-4  | KJ524638         | ck/CH/GD/LZ12          |
| KJ524602         | ck/CH/GX/NN11-4  | KJ524639         | ck/CH/HuN/CX12         |
| KJ524603         | ck/CH/AH/WH11    | KJ524640         | ck/CH/GX/YL12-2        |
| KJ524604         | ck/CH/ZJ/QZ11    | KJ524641         | ck/CH/GD/XX12          |
| KJ524605         | ck/CH/SC/DY11    | KJ544558         | ck/CH/FJ/PT12          |
| KJ524606         | ck/CH/SC/MS11-5  | KC478646         | ck/CH/Shaanxi/2009/W09 |
| KJ524607         | ck/CH/GX/GL11-4  | KC478647         | ck/CH/Shaanxi/2009/H09 |
| KJ524608         | ck/CH/GX/YL12-1  | KC478648         | ck/CH/Shaanxi/2012/WN  |
| KJ524609         | ck/CH/GD/CG12-2  | KC478649         | ck/CH/Shaanxi/2012/BJ  |
| KJ524610         | ck/CH/GD/CG12-1  | KF007201         | SDIB662/2011           |
| KJ524611         | ck/CH/ZJ/QZ12-1  | KF007202         | SDIB669/2012           |
| KJ524612         | ck/CH/ZJ/QZ12-2  | KF007203         | SDIB679/2012           |
| KJ524613         | ck/CH/SC/DY12-1  | KF007204         | SDIB702/2012           |
| KJ524614         | ck/CH/SC/DY12-2  | KF007205         | SDIB768/2012           |
| KJ524615         | ck/CH/GD/LY12    | KF007206         | SDIB763/2012           |
| JQ764815         | GX-C             | KF007207         | SDIB764/2012           |
| JQ764816         | GX-G             | KF007208         | SDIB778/2012           |

---

|          |                  |          |              |
|----------|------------------|----------|--------------|
| JQ764817 | GX-LZ1           | KF007209 | SDIB781/2012 |
| JQ764818 | GX-NN6           | KF007210 | SDIB821/2012 |
| JQ764819 | GX-NN8           | KC577387 | 45HeB-96I    |
| JQ764820 | GX-NN10          | KC577388 | 48SD-96VI    |
| JQ764821 | GX-NN12          | KC577389 | 49AH-97I     |
| JQ764822 | GX-YL1           | KC577390 | 50HeN-99III  |
| JQ764823 | GX-YL2           | KC577391 | 53XJ-99II    |
| JQ764824 | GX-YL6           | KC577392 | 54HaN-95I    |
| JQ764825 | GX-YL7           | KC577393 | 55HaN-95II   |
| JQ764826 | GX-YL9           | KC577394 | 56GX-98I     |
| JQ764827 | GX-NN5           | KC577395 | 58HeN-93II   |
| JQ764828 | GX-XD            | KC577396 | 60SC-93II    |
| KC795604 | QX-IBV           | KC577397 | 66GD-98VI    |
| KC708008 | ck/CH/FNO-E/2009 | KC577398 | 68GX-09I     |
| KC577362 | 11HIBV97         | KC577399 | 69GX-08I     |
| KC577363 | 12SWIBV97        | KC577400 | 70GX-08II    |
| KC577364 | 13JNIBV98        | KC577401 | 72HaN-09I    |
| KC577365 | QXIBV2           | KC577402 | 73GX-08III   |
| KC577366 | 16GNIBV98        | KC577403 | 74GD-09I     |
| KC577367 | 17HeBIBV98       | KC577404 | 75GX-07I     |
| KC577368 | 18HeNIBV98       | KC577405 | 78GX-08IV    |
| KC577369 | 19JSNJ97         | KC577406 | 79HaN-09III  |
| KC577370 | 24SDPL-01I       | KC577407 | 80GX-09IV    |
| KC577371 | 25SDZC-01I       | KC577408 | 81HaN-09IV   |
| KC577372 | 26SDTA-01I       | KC577409 | 83GX-09V     |
| KC577373 | 27SDTA-01II      | KC577410 | 84CQ-09I     |
| KC577374 | 30JX-99I         | KC577411 | 87GX-08VII   |
| KC577375 | 31JL-97I         | KC577412 | 88GX-08VIII  |
| KC577376 | 32JS-97I         | KC577413 | 89HaN-09VI   |
| KC577377 | 33JS-95III       | KC577414 | 90GX-08IX    |
| KC577378 | 34TJ-96II        | KC577415 | 91GX-08X     |
| KC577379 | 35SD-97I         | KC577416 | 93GD-09II    |
| KC577380 | 36SD-97II        | KC577417 | 95GD-09III   |
| KC577381 | 37HeN-96IV       | KC577418 | 96GX-09VI    |
| KC577382 | 40GDGZ-97I       | KC577419 | 97HaN-09VIII |
| KC577383 | 41SD-97IV        | KC577420 | 98GD-09IV    |
| KC577384 | 42HLJ-98I        | KC577421 | 101GD-10I    |
| KC577385 | 43SD-96III       | KC577422 | 102GD-10II   |
| KC577386 | 44SX-96I         | KC577423 | 103GD-10III  |
| KC577424 | 104GD-10IV       | JX291987 | GX-NN-9      |
| JX291983 | GX-NN-4          | JX291985 | GX-NN-6      |
| JX291984 | GX-NN-5          | JX291986 | GX-NN-8      |
| JX291988 | GX-NN-11         | KC357729 | HC13         |
| JX291989 | GX-NN-13         | KC357730 | HC14         |

---

---

|          |                 |          |                       |
|----------|-----------------|----------|-----------------------|
| JX291990 | GX-NN-14        | KC357731 | HC15                  |
| JX291991 | GX-NN-15        | KC357732 | HC16                  |
| JX291992 | GX-GL11077      | KC357733 | HC17                  |
| JX291993 | GX-GL11078      | KC414154 | chicken/CH/SD/2011/08 |
| JX291994 | GX-GL11079      | KC346975 | SC1201                |
| JX291995 | GX-YL11072      | JQ900089 | ck/CH/JS/2009/1       |
| JX291996 | GX-YL11073      | JQ900090 | ck/CH/JS/2009/2       |
| JX291997 | GX-NN11033      | JQ900091 | ck/CH/JS/2009/3       |
| JX291998 | GX-GL2          | JQ900092 | ck/CH/JS/2009/4       |
| JX291999 | GX-NN11034      | JQ900093 | ck/CH/JS/2009/5       |
| JX292000 | GX-NN1009       | JQ900094 | ck/CH/AH/2009/1       |
| JX292001 | GX-NN1011       | JQ900095 | ck/CH/AH/2009/2       |
| JX292002 | GX-NN1012       | JQ900096 | ck/CH/AH/2009/3       |
| JX292003 | GX-NN1013       | JQ900097 | ck/CH/FJ/2009/1       |
| JX292004 | GX-NN1014       | JQ900098 | ck/CH/GX/2009/1       |
| JX292005 | GX-NN1019       | JQ900099 | ck/CH/JL/2009/1       |
| JX292006 | GX-YL1121       | JQ900100 | ck/CH/AH/2010/5       |
| JX292007 | GD-KP1033       | JQ900101 | ck/CH/JS/2010/1       |
| JX292008 | GX-GL           | JQ900102 | ck/CH/JS/2010/2       |
| JX292009 | GX-HC1006       | JQ900103 | ck/CH/SD/2010/1       |
| JX292010 | GX-YL1002       | JQ900104 | ck/CH/JL/2010/1       |
| JX292011 | GX-NN09093      | JQ900105 | ck/CH/ZJ/2010/2       |
| JX292012 | GX-QZ09094      | JQ900106 | ck/CH/JS/2010/3       |
| JX292013 | GX-NN09032      | JQ900107 | ck/CH/AH/2010/7       |
| JX292014 | GX-YL0902       | JQ900108 | ck/CH/AH/2010/8       |
| KC478590 | SC1204          | JQ900109 | ck/CH/ZJ/2010/3       |
| KC478591 | SC1203          | JQ900110 | ck/CH/AH/2010/9       |
| KC478592 | SC1202          | JQ900111 | ck/CH/AH/2010/11      |
| KC430863 | GX-YL4          | JQ900112 | ck/CH/JS/2010/6       |
| KC357716 | HC18            | JQ900113 | ck/CH/JS/2010/7       |
| KC357717 | HC1             | JQ900114 | ck/CH/JS/2010/8       |
| KC357718 | HC2             | JQ900115 | ck/CH/JS/2010/9       |
| KC357719 | HC3             | JQ900116 | ck/CH/ZJ/2010/4       |
| KC357720 | HC4             | JQ900117 | ck/CH/ZJ/2010/5       |
| KC357721 | HC5             | JQ900118 | ck/CH/JL/2010/2       |
| KC357722 | HC6             | JQ900119 | ck/CH/AH/2010/13      |
| KC357724 | HC8             | JQ900120 | ck/CH/AH/2010/14      |
| KC357725 | HC9             | JQ900121 | ck/CH/JL/2010/3       |
| KC357726 | HC10            | JQ900122 | ck/CH/JS/2010/12      |
| KC357727 | HC11            | JQ900123 | ck/CH/JS/2010/13      |
| KC357728 | HC12            | JQ900124 | ck/CH/ZJ/2010/6       |
| JQ900129 | ck/CH/JS/2011/7 | JQ900125 | ck/CH/ZJ/2010/7       |
| JQ900130 | ck/CH/JS/2011/8 | JQ900126 | ck/CH/JS/2011/2       |
| JQ900131 | ck/CH/AH/2011/2 | JQ900127 | ck/CH/JS/2011/5       |

---

---

|          |                   |          |                   |
|----------|-------------------|----------|-------------------|
| JQ900132 | ck/CH/JL/2011/1   | JQ900128 | ck/CH/JS/2011/6   |
| JQ900133 | ck/CH/HeB/2011/1  | JQ739257 | ck/CH/LHB/110957  |
| JQ900134 | ck/CH/JS/2011/9   | JQ739258 | ck/CH/LHB/110968  |
| JQ900135 | ck/CH/JS/2011/10  | JQ739259 | ck/CH/LHB/111101  |
| JQ900136 | ck/CH/SD/2011/1   | JQ739260 | ck/CH/LHB/111102  |
| JQ900137 | ck/CH/AH/2011/3   | JQ739261 | ck/CH/LHB/111107  |
| JQ900138 | ck/CH/HeB/2011/2  | JQ739262 | ck/CH/LHB/111108  |
| JQ900139 | ck/CH/JS/2011/11  | JQ739263 | ck/CH/LHB/111109  |
| JQ900140 | ck/CH/JS/2011/12  | JQ739264 | ck/CH/LHB/111116  |
| JQ900141 | ck/CH/JS/2011/13  | JQ739265 | ck/CH/LHB/111124  |
| JX569792 | ck/CH/HN/1205     | JQ739266 | ck/CH/LHB/111127  |
| JX535283 | SCTW              | JQ739267 | ck/CH/LHB/111128  |
| JQ234966 | GX-GL1121         | JQ739268 | ck/CH/LHB/111146  |
| JX436328 | GX-GL1            | JQ739269 | ck/CH/LHB/111148  |
| JX436329 | GX-NN4            | JQ739270 | ck/CH/LHB/111149  |
| JX436330 | GX-GL2005         | JQ739271 | ck/CH/LHB/111167  |
| JX436331 | GX-NN1201         | JQ739272 | ck/CH/LHB/111168  |
| JX003634 | GX-LC1124         | JQ739273 | ck/CH/LHB/111172  |
| JQ739235 | ck/CH/LAH/111115  | JQ739274 | ck/CH/LHB/111173  |
| JQ739236 | ck/CH/LDL/110671  | JQ739275 | ck/CH/LHB/111184  |
| JQ739237 | ck/CH/LDL/110931  | JQ739276 | ck/CH/LHB/111190  |
| JQ739238 | ck/CH/LHB/110121  | JQ739277 | ck/CH/LHB/111192  |
| JQ739239 | ck/CH/LHB/110123  | JQ739278 | ck/CH/LHB/111207  |
| JQ739240 | ck/CH/LHB/110526  | JQ739279 | ck/CH/LHB/111211  |
| JQ739241 | ck/CH/LHB/110605  | JQ739280 | ck/CH/LHB/111224  |
| JQ739242 | ck/CH/LHB/110607  | JQ739281 | ck/CH/LHB/111225  |
| JQ739243 | ck/CH/LHB/110615  | JQ739282 | ck/CH/LHB/111227  |
| JQ739244 | ck/CH/LHB/110617  | JQ739283 | ck/CH/LHB/111231  |
| JQ739245 | ck/CH/LHB/110661  | JQ739284 | ck/CH/LHB/111232  |
| JQ739246 | ck/CH/LHB/110753  | JQ739285 | ck/CH/LHB/111254  |
| JQ739247 | ck/CH/LHB/110754  | JQ739286 | ck/CH/LHB/111256  |
| JQ739248 | ck/CH/LHB/110803  | JQ739287 | ck/CH/LHB/111258  |
| JQ739249 | ck/CH/LHB/110806  | JQ739288 | ck/CH/LHB/111265  |
| JQ739250 | ck/CH/LHB/110816  | JQ739289 | ck/CH/LHB/111267  |
| JQ739251 | ck/CH/LHB/110817  | JQ739290 | ck/CH/LHB/111268  |
| JQ739252 | ck/CH/LHB/110818  | JQ739291 | ck/CH/LHB/1112103 |
| JQ739253 | ck/CH/LHB/110820  | JQ739292 | ck/CH/LHB/1112104 |
| JQ739254 | ck/CH/LHB/110825  | JQ739293 | ck/CH/LHB/1112109 |
| JQ739255 | ck/CH/LHB/110846  | JQ739294 | ck/CH/LHLJ/110310 |
| JQ739256 | ck/CH/LHB/110849  | JQ739295 | ck/CH/LHLJ/110530 |
| JQ739296 | ck/CH/LHLJ/110620 | JQ739339 | ck/CH/LSD/110115  |
| JQ739297 | ck/CH/LHLJ/110621 | JQ739340 | ck/CH/LSD/110311  |
| JQ739298 | ck/CH/LHLJ/110658 | JQ739341 | ck/CH/LSD/110312  |
| JQ739299 | ck/CH/LHLJ/110664 | JQ739342 | ck/CH/LSD/110314  |

---

---

|          |                   |          |                  |
|----------|-------------------|----------|------------------|
| JQ739300 | ck/CH/LHLJ/110672 | JQ739343 | ck/CH/LSD/110315 |
| JQ739301 | ck/CH/LHLJ/110673 | JQ739344 | ck/CH/LSD/110325 |
| JQ739302 | ck/CH/LHLJ/110772 | JQ739345 | ck/CH/LSD/110326 |
| JQ739303 | ck/CH/LHLJ/110835 | JQ739346 | ck/CH/LSD/110328 |
| JQ739304 | ck/CH/LHLJ/110836 | JQ739347 | ck/CH/LSD/110330 |
| JQ739305 | ck/CH/LHLJ/110901 | JQ739348 | ck/CH/LSD/110334 |
| JQ739306 | ck/CH/LHLJ/110902 | JQ739349 | ck/CH/LSD/110347 |
| JQ739307 | ck/CH/LHLJ/110907 | JQ739350 | ck/CH/LSD/110348 |
| JQ739308 | ck/CH/LHLJ/110909 | JQ739351 | ck/CH/LSD/110408 |
| JQ739309 | ck/CH/LHLJ/110935 | JQ739352 | ck/CH/LSD/110409 |
| JQ739310 | ck/CH/LHLJ/110943 | JQ739353 | ck/CH/LSD/110410 |
| JQ739311 | ck/CH/LHLJ/110949 | JQ739354 | ck/CH/LSD/110415 |
| JQ739312 | ck/CH/LHLJ/110966 | JQ739355 | ck/CH/LSD/110417 |
| JQ739313 | ck/CH/LHLJ/111023 | JQ739356 | ck/CH/LSD/110435 |
| JQ739314 | ck/CH/LHLJ/111043 | JQ739357 | ck/CH/LSD/110505 |
| JQ739315 | ck/CH/LHLJ/111050 | JQ739358 | ck/CH/LSD/110510 |
| JQ739316 | ck/CH/LHLJ/111119 | JQ739359 | ck/CH/LSD/110511 |
| JQ739317 | ck/CH/LHLJ/111154 | JQ739360 | ck/CH/LSD/110520 |
| JQ739318 | ck/CH/LHLJ/111205 | JQ739361 | ck/CH/LSD/110529 |
| JQ739319 | ck/CH/LHLJ/111246 | JQ739362 | ck/CH/LSD/110707 |
| JQ739320 | ck/CH/LHN/110352  | JQ739363 | ck/CH/LSD/110712 |
| JQ739321 | ck/CH/LHN/110518  | JQ739364 | ck/CH/LSD/110719 |
| JQ739322 | ck/CH/LHN/111283  | JQ739365 | ck/CH/LSD/110722 |
| JQ739323 | ck/CH/LJL/110302  | JQ739366 | ck/CH/LSD/110723 |
| JQ739324 | ck/CH/LJL/110303  | JQ739367 | ck/CH/LSD/110726 |
| JQ739325 | ck/CH/LJL/110437  | JQ739368 | ck/CH/LSD/110731 |
| JQ739326 | ck/CH/LJL/110439  | JQ739369 | ck/CH/LSD/110733 |
| JQ739327 | ck/CH/LJL/110654  | JQ739370 | ck/CH/LSD/110739 |
| JQ739328 | ck/CH/LJL/111052  | JQ739371 | ck/CH/LSD/110741 |
| JQ739329 | ck/CH/LJL/111054  | JQ739372 | ck/CH/LSD/110851 |
| JQ739330 | ck/CH/LJS/111111  | JQ739373 | ck/CH/LSD/110854 |
| JQ739331 | ck/CH/LJS/111208  | JQ739374 | ck/CH/LSD/110856 |
| JQ739332 | ck/CH/LJS/111209  | JQ739375 | ck/CH/LSD/110857 |
| JQ739333 | ck/CH/LJS/111210  | JQ739376 | ck/CH/LSD/110910 |
| JQ739334 | ck/CH/LLN/111169  | JQ739377 | ck/CH/LSD/110912 |
| JQ739335 | ck/CH/LNM/110932  | JQ739378 | ck/CH/LSD/110913 |
| JQ739336 | ck/CH/LNM/110943  | JQ739379 | ck/CH/LSD/110918 |
| JQ739337 | ck/CH/LSD/110112  | JQ739380 | ck/CH/LSD/111025 |
| JQ739338 | ck/CH/LSD/110113  | JQ739381 | ck/CH/LSD/111037 |
| JQ739382 | ck/CH/LSD/111041  | JF951374 | SCMS-1           |
| JQ739383 | ck/CH/LSD/111042  | JF951375 | SCMS-2           |
| JQ739384 | ck/CH/LSD/111045  | JF951376 | SCMS-3           |
| JQ739385 | ck/CH/LSD/111218  | JF951377 | SCMS-4           |
| JQ739386 | ck/CH/LSD/111219  | JF738084 | ck/CH/SD10/002   |

---



|          |                   |          |                   |
|----------|-------------------|----------|-------------------|
| JQ739387 | ck/CH/LSD/111220  | JF738085 | ck/CH/SD10/003    |
| JQ739388 | ck/CH/LSD/111221  | JF330848 | ck/CH/LDL/101212  |
| JQ739389 | ck/CH/LSD/111222  | JF330849 | ck/CH/LDL/101215  |
| JQ739390 | ck/CH/LSD/111223  | JF330850 | ck/CH/LGS/100521  |
| JQ739391 | ck/CH/LSD/111235  | JF330851 | ck/CH/LHB/100904  |
| JQ739392 | ck/CH/LSD/111241  | JF330852 | ck/CH/LHB/100906  |
| JQ739393 | ck/CH/LSD/111261  | JF330853 | ck/CH/LHB/100908  |
| JQ739394 | ck/CH/LSD/111266  | JF330854 | ck/CH/LHLJ/100309 |
| JQ739395 | ck/CH/LSD/111297  | JF330855 | ck/CH/LHLJ/100902 |
| JQ739396 | ck/CH/LSD/1112114 | JF330856 | ck/CH/LHN/101208  |
| JQ739397 | ck/CH/LSD/1112115 | JF330857 | ck/CH/LHN/101209  |
| JQ739398 | ck/CH/LSD/1112130 | JF330858 | ck/CH/LHN/101210  |
| JQ739399 | ck/CH/LSD/1112132 | JF330859 | ck/CH/LHN/101211  |
| JQ739400 | ck/CH/LSD/1112133 | JF330860 | ck/CH/LJL/100501  |
| JQ739401 | ck/CH/LSD/1112134 | JF330861 | ck/CH/LJL/100512  |
| JQ739402 | ck/CH/LSD/1112138 | JF330862 | ck/CH/LJL/100513  |
| JQ739403 | ck/CH/LSD/1112139 | JF330863 | ck/CH/LJL/100515  |
| JQ739404 | ck/CH/LSD/1112142 | JF330864 | ck/CH/LJL/100713  |
| JQ739405 | ck/CH/LSD/1112147 | JF330865 | ck/CH/LJL/100918  |
| JQ739406 | ck/CH/LSD/1112150 | JF330866 | ck/CH/LJL/101131  |
| JQ739407 | ck/CH/LSD/1112155 | JF330867 | ck/CH/LJS/101105  |
| JQ739408 | ck/CH/LXJ/111265  | JF330868 | ck/CH/LJL/101150  |
| JQ739409 | ck/CH/LZJ/111113  | JF330869 | ck/CH/LJS/101106  |
| JQ739410 | ck/CH/LZJ/111114  | JF330870 | ck/CH/LJS/101108  |
| JQ801378 | HH11              | JF330871 | ck/CH/LJS/101109  |
| JQ250818 | QS                | JF330872 | ck/CH/LJS/101110  |
| JN032761 | ck/CH/AH/2010/II  | JF330873 | ck/CH/LJS/101111  |
| JF682372 | XT                | JF330874 | ck/CH/LJS/101112  |
| JF694495 | JS                | JF330875 | ck/CH/LJS/101113  |
| JF694496 | HP                | JF330876 | ck/CH/LJS/101114  |
| JF694497 | JZ                | JF330877 | ck/CH/LJS/101115  |
| JF951367 | SCCQ-1            | JF330878 | ck/CH/LJS/101237  |
| JF951368 | SCZJ-1            | JF330879 | ck/CH/LLN/101213  |
| JF951369 | SCZJ-2            | JF330880 | ck/CH/LSD/100102  |
| JF951370 | SCZJ-3            | JF330881 | ck/CH/LSD/100205  |
| JF951371 | SCZJ-4            | JF330882 | ck/CH/LSD/100208  |
| JF951372 | SCDY-1            | JF330883 | ck/CH/LSD/100305  |
| JF951373 | SCDY-2            | JF330884 | ck/CH/LSD/100311  |
| JF330885 | ck/CH/LSD/100312  | HQ018905 | ck/CH/GX/YL09-2   |
| JF330886 | ck/CH/LSD/100315  | HQ018906 | ck/CH/GD/XX10     |
| JF330887 | ck/CH/LSD/100318  | HQ018907 | ck/CH/GD/XX09     |
| JF330888 | ck/CH/LSD/100504  | HQ018908 | ck/CH/GD/YN09-1   |
| JF330889 | ck/CH/LSD/100505  | HQ018909 | ck/CH/GD/YN09-2   |
| JF330890 | ck/CH/LSD/101139  | HQ018910 | ck/CH/GX/GL10     |

|          |                   |          |                              |
|----------|-------------------|----------|------------------------------|
| JF330891 | ck/CH/LSD/101216  | HQ018911 | ck/CH/GX/LC10                |
| JF330892 | ck/CH/LSD/101217  | HQ018912 | ck/CH/GX/YL10-1              |
| JF330893 | ck/CH/LSD/101221  | HQ018913 | ck/CH/GX/YL10-2              |
| JF330894 | ck/CH/LSD/101222  | HQ018914 | ck/CH/SC/MS10                |
| JF330895 | ck/CH/LSD/101223  | HQ018915 | ck/CH/HN/HN10                |
| JF330896 | ck/CH/LSD/101224  | HQ018916 | ck/CH/HeB/CZ10               |
| JF330897 | ck/CH/LSD/101225  | HQ018917 | ck/CH/TJ/NH10                |
| JF330900 | ck/CH/LJS/101116  | HQ018918 | ck/CH/SC/ZJ10-1              |
| JF330901 | ck/CH/LJS/101117  | HQ018919 | ck/CH/GD/KP10                |
| JF330902 | ck/CH/LSD/100408  | HQ018920 | ck/CH/SC/ZJ10-2              |
| JF330903 | ck/CH/LSD/100409  | HQ018921 | ck/CH/GD/ZX10                |
| JF330904 | ck/CH/LSD/100412  | HM540074 | GX-NN2                       |
| HQ132760 | GX-NN1            | HM540075 | GX-NN3                       |
| HQ185567 | ck/TW/T15/2006    | HM540076 | GX-NN9                       |
| HQ018882 | ck/CH/SC/DY09     | HM540077 | GX-NN11                      |
| HQ018883 | ck/CH/HB/HC09-1   | HM540078 | GX-YL3                       |
| HQ018884 | ck/CH/HB/HC09-2   | HQ018928 | GX-YL8                       |
| HQ018885 | ck/CH/AH/HF10     | HQ398360 | 0801                         |
| HQ018886 | ck/CH/HN/HN09     | HM230749 | ck/CH/SD09/005               |
| HQ018887 | ck/CH/GD/HY09     | HM194639 | ck/CH/LDL/091021             |
| HQ018888 | ck/CH/ZJ/HZ09     | HM194640 | ck/CH/LDL/091022             |
| HQ018889 | ck/CH/ZJ/HZ10     | HM194641 | ck/CH/LGD/090907             |
| HQ018890 | ck/CH/JX/JA09-1   | HM194642 | ck/CH/LGX/091109             |
| HQ018891 | ck/CH/JX/JA09-2   | HM194643 | ck/CH/LGX/091110             |
| HQ018892 | ck/CH/HB/JL09     | HM194644 | ck/CH/LGX/091111             |
| HQ018893 | ck/CH/JS/JL10     | HM194645 | ck/CH/LGX/091112             |
| HQ018894 | ck/CH/GD/LY10     | HM194646 | ck/CH/LHB/090404             |
| HQ018895 | ck/CH/JS/LYG09    | HM194647 | ck/CH/LHB/090406             |
| HQ018896 | ck/CH/GD/LZ09     | HM194648 | ck/CH/LHB/090914             |
| HQ018897 | ck/CH/SC/MS09     | HM194649 | ck/CH/LHB/090916             |
| HQ018898 | ck/CH/FJ/PT10     | HM194650 | ck/CH/LHB/090919             |
| HQ018899 | ck/CH/HuN/NX09    | HM194651 | ck/CH/LHB/090920             |
| HQ018900 | ck/CH/GX/NN09     | HM194652 | ck/CH/LHB/090921             |
| HQ018901 | ck/CH/JS/NJ10     | HM194653 | ck/CH/LHB/090924             |
| HQ018902 | ck/CH/JS/NJ09     | HM194654 | ck/CH/LHLJ/090323            |
| HQ018903 | ck/CH/GD/NC10     | HM194655 | ck/CH/LHLJ/090410            |
| HQ018904 | ck/CH/GX/YL09-1   | HM194656 | ck/CH/LHLJ/090428            |
| HM194657 | ck/CH/LHLJ/090438 | GU938365 | ck/CH/Guangdong/Xinnong/0811 |
| HM194658 | ck/CH/LHLJ/090510 | GU938366 | ck/CH/Guangdong/Lianhua/0806 |
| HM194659 | ck/CH/LHLJ/090515 | GU938367 | ck/CH/Guangdong/DashaY9/0902 |
| HM194660 | ck/CH/LHLJ/090603 | GU938368 | ck/CH/Guangdong/DashaY4/0902 |
| HM194661 | ck/CH/LHLJ/090604 | GU938369 | ck/CH/Hubei/Wuhan1/0901      |
| HM194662 | ck/CH/LHLJ/090605 | GU938370 | ck/CH/Hubei/WuHan2/0901      |
| HM194663 | ck/CH/LHLJ/090607 | GU938371 | ck/CH/Hubei/WuHan3/0901      |

|          |                   |          |                                |
|----------|-------------------|----------|--------------------------------|
| HM194664 | ck/CH/LHLJ/090619 | GU938372 | ck/CH/Hubei/WuHan4/0901        |
| HM194665 | ck/CH/LHLJ/090640 | GU938373 | ck/CH/Guangdong/Xinnong1/0901  |
| HM194666 | ck/CH/LHLJ/090712 | GU938374 | ck/CH/Guangdong/Xinnong2/0901  |
| HM194667 | ck/CH/LHLJ/090805 | GU938375 | ck/CH/Guangdong/Shuitai/0901   |
| HM194668 | ck/CH/LHLJ/090806 | GU938376 | ck/CH/Hainan1/0903             |
| HM194669 | ck/CH/LHLJ/090908 | GU938377 | ck/CH/Hainan2/0903             |
| HM194670 | ck/CH/LHLJ/090912 | GU938378 | ck/CH/Hainan1/0904             |
| HM194671 | ck/CH/LHLJ/091202 | GU938379 | ck/CH/Hainan2/0904             |
| HM194672 | ck/CH/LHLJ/091205 | GU938380 | ck/CH/Hainan3/0904             |
| HM194673 | ck/CH/LHN/091025  | GU938381 | ck/CH/Hainan4/0904             |
| HM194674 | ck/CH/LJL/090330  | GU938382 | ck/CH/Hainan1/0901             |
| HM194675 | ck/CH/LJL/090419  | GU938383 | ck/CH/Hainan2/0901             |
| HM194676 | ck/CH/LJL/090608  | GU938384 | ck/CH/Hainan3/0903             |
| HM194677 | ck/CH/LJL/090614  | GU938385 | ck/CH/Guangdong/Baitu/0904     |
| HM194678 | ck/CH/LLN/090312  | GU938386 | ck/CH/Guangdong/Heyuan1/0904   |
| HM194679 | ck/CH/LLN/090907  | GU938387 | ck/CH/Guangdong/Heyuan2/0904   |
| HM194680 | ck/CH/LLN/090909  | GU938388 | ck/CH/Guangdong/Lezhu3/0905    |
| HM194681 | ck/CH/LLN/090910  | GU938389 | ck/CH/Guangxi/Guilin/0811      |
| HM194682 | ck/CH/LNM/091017  | GU938390 | ck/CH/Guangxi/Guilin1/0806     |
| HM194683 | ck/CH/LNX/090442  | HM159252 | ck/CH/SD09/003                 |
| HM194684 | ck/CH/LSD/090314  | HM159253 | ck/CH/SD09/004                 |
| HM194685 | ck/CH/LSD/090316  | HM159254 | ck/CH/SD09/006                 |
| HM194686 | ck/CH/LSD/090320  | HM159255 | ck/CH/SD09/002                 |
| HM194687 | ck/CH/LSD/090326  | HM113492 | FJ09                           |
| HM194688 | ck/CH/LSD/090334  | HM113493 | HN09-1                         |
| HM194689 | ck/CH/LSD/090401  | HM113494 | HN09-2                         |
| HM194690 | ck/CH/LSD/090402  | HM113495 | JX09                           |
| HM194691 | ck/CH/LSD/090411  | HM113496 | SS09-1                         |
| HM194692 | ck/CH/LSD/090432  | HM113497 | XX09-3                         |
| HM194693 | ck/CH/LSD/090434  | HM106334 | ck/CH/SCMS/10I                 |
| HM194694 | ck/CH/LSD/090437  | HM106335 | ck/CH/SCCD/10I                 |
| HM194695 | ck/CH/LSD/090440  | HM106336 | ck/CH/SCDY/10I                 |
| HM194696 | ck/CH/LSD/090509  | HM034813 | YI                             |
| HM194697 | ck/CH/LSD/090517  | HM034814 | WZL                            |
| HM194698 | ck/CH/LSD/090518  | HM031117 | A2-2                           |
| HM194699 | ck/CH/LSD/090520  | HM031118 | S-03                           |
| HM194700 | ck/CH/LSD/090521  | GU938391 | ck/CH/Guangxi/Yulin/0812       |
| HM194701 | ck/CH/LSD/090708  | GU938392 | ck/CH/Jiangsu/Lianyungang/0902 |
| HM194702 | ck/CH/LSD/090709  | GU938393 | ck/CH/Guangxi/Yulin/0906       |
| HM194703 | ck/CH/LSD/090710  | GU938394 | ck/CH/Guangxi/Luchuan/0906     |
| HM194704 | ck/CH/LSD/090809  | GU938395 | ck/CH/Guangxi/Hezhou/0903      |
| HM194705 | ck/CH/LSD/090816  | GU938396 | ck/CH/Guangxi/Guilin2/0806     |
| HM194706 | ck/CH/LSD/090902  | GU938397 | ck/CH/Guangdong/Lezhu1/0905    |
| HM194707 | ck/CH/LSD/091003  | GU938398 | ck/CH/Guangdong/Lezhu2/0905    |

|          |                                 |          |                                |
|----------|---------------------------------|----------|--------------------------------|
| HM194708 | ck/CH/LSD/091004                | GU938399 | ck/CH/Guangxi/Yulin/0904       |
| HM194709 | ck/CH/LSD/091005                | GU938400 | ck/CH/Guangxi/Nanning/0903     |
| HM194710 | ck/CH/LSD/091014                | GU938401 | ck/CH/Guangdong/Heyuan1/0905   |
| HM194711 | ck/CH/LSD/091108                | GU938402 | ck/CH/Guangdong/Keyanjidi/0908 |
| HM194712 | ck/CH/LSD/091154                | GU938403 | ck/CH/Guangxi/Luchuan1/0910    |
| HM194713 | ck/CH/LSD/091159                | GU938404 | ck/CH/Guangxi/Luchuan2/0910    |
| HM194714 | ck/CH/LSD/091203                | GU938405 | ck/CH/Guangxi/Luchuan3/0910    |
| HM194715 | ck/CH/LSD/091204                | GU938406 | ck/CH/Guangdong/Heyuan1/0910   |
| HM194716 | ck/CH/LSD/090519                | GU938407 | ck/CH/Guangdong/Heyuan2/0910   |
| HM363025 | ck/CH/SCNC/08I                  | GU938408 | ck/CH/Fujian/Putian1/0910      |
| HM363026 | ck/CH/SCSN/10I                  | GU938409 | ck/CH/Fujian/Putian2/0910      |
| HM363027 | ck/CH/SCYA/10I                  | GU938410 | ck/CH/Fujian/Putian3/0910      |
| HM363028 | ck/CH/SCMY/10I                  | GU938411 | ck/CH/Fujian/Putian4/0910      |
| HM159247 | ck/CH/SD10/001                  | GU938412 | ck/CH/NanJiao/0904             |
| HM159248 | ck/CH/SD08/006                  | GU938425 | ck/CH/Zhejiang/Huzhou1/0910    |
| HM159249 | ck/CH/SD08/007                  | GU938426 | ck/CH/Zhejiang/Huzhou2/0910    |
| HM159250 | ck/CH/SD08/008                  | GU938427 | ck/CH/Zhejiang/Huzhou3/0910    |
| HM159251 | ck/CH/SD09/001                  | GU938428 | ck/CH/Zhejiang/Huzhou4/0910    |
| GU938413 | ck/CH/Chongqing/0908            | GU938429 | ck/CH/Zhejiang/Huzhou5/0910    |
| GU938414 | ck/CH/Chongqing/0909            | GU938430 | ck/CH/Zhejiang/Huzhou6/0910    |
| GU938415 | ck/CH/Sichuan/Meishan/0910      | GU938431 | ck/CH/Zhejiang/Quzhou1/0910    |
| GU938416 | ck/CH/Guangdong/Heyuan2/0905    | GU938432 | ck/CH/Zhejiang/Quzhou2/0910    |
| GU938417 | ck/CH/Guangxi/Luchuan4/0910     | GU938433 | ck/CH/Zhejiang/Quzhou3/0910    |
| GU938418 | ck/CH/Guangxi/Luchuan5/0910     | GU938434 | ck/CH/Zhejiang/Huzhou7/0910    |
| GU938419 | ck/CH/Guangxi/Luchuan6/0910     | GU938435 | ck/CH/Zhejiang/Huzhou8/0910    |
| GU938420 | ck/CH/Guangxi/Luchuan7/0910     | GU938436 | ck/CH/Zhejiang/Huzhou9/0910    |
| GU938421 | ck/CH/Guangdong/Heyuan3/0910    | GU938437 | ck/CH/Guangdong/Shuitai/0903   |
| GU938422 | ck/CH/Guangxi/Luchuan8/0910     | GU938438 | ck/CH/Guangdong/Xindadi/0902   |
| GU938423 | ck/CH/Guangdong/Shalang/0910    | GU938439 | ck/CH/Hainan/0811              |
| GU938424 | ck/CH/Guangxi/Luchuan9/0910     | GU938440 | ck/CH/Guangdong/Wulian/0901    |
| GU938441 | ck/CH/Guangdong/Fengmulang/0901 | GQ258307 | ck/CH/LDL/08II                 |
| GU938442 | ck/CH/Guangdong/Xindadi/0903    | GQ258308 | ck/CH/LDL/08III                |
| GU938443 | ck/CH/Guangdong/Heyuan/0902     | GQ258309 | ck/CH/LDL/08IV                 |
| GU938444 | ck/CH/Hainan4/0903              | GQ258310 | ck/CH/LGS/08I                  |
| GU384207 | ck/CH/EM/09I                    | GQ258311 | ck/CH/LHB/08I                  |
| GU727853 | ck/CH/SCBY/09I                  | GQ258312 | ck/CH/LHLJ/08I                 |
| GU727854 | ck/CH/CD/08I                    | GQ258313 | ck/CH/LHLJ/08II                |
| GU727855 | ck/CH/SCCD/09I                  | GQ258314 | ck/CH/LHLJ/08III               |
| GU727856 | ck/CH/SCDY/09I                  | GQ258315 | ck/CH/LHLJ/08IV                |
| GU727857 | ck/CH/SCLS/08I                  | GQ258316 | ck/CH/LJL/08I                  |
| GU727858 | ck/CH/SCMS/08I                  | GQ258317 | ck/CH/LJL/08II                 |
| GU727859 | ck/CH/SCMS/09I                  | GQ258318 | ck/CH/LJL/08III                |
| GU727860 | ck/CH/SCMY/09I                  | GQ258319 | ck/CH/LJL/08IV                 |
| GU727861 | ck/CH/SCYA/08I                  | GQ258320 | ck/CH/LJS/08I                  |

|          |                |          |                  |
|----------|----------------|----------|------------------|
| GU727862 | ck/CH/SCZG/08I | GQ258321 | ck/CH/LJS/08II   |
| GU455379 | Jin-13         | GQ258322 | ck/CH/LLN/08I    |
| GU455380 | XP/1/09        | GQ258323 | ck/CH/LLN/08II   |
| GU455381 | XP/3           | GQ258324 | ck/CH/LSD/08-1   |
| GQ853588 | IBVSX7         | GQ258325 | ck/CH/LSD/08-10  |
| GU455384 | IBVSX9         | GQ258326 | ck/CH/LSD/08-11  |
| GQ853590 | IBVSX5         | GQ258327 | ck/CH/LSD/08-12  |
| GQ844985 | Beijing-98     | GQ258328 | ck/CH/LSD/08-2   |
| GQ844986 | Chongqing-06   | GQ258329 | ck/CH/LSD/08-3   |
| GQ844987 | Deyang-06      | GQ258330 | ck/CH/LSD/08-4   |
| GQ844988 | Guangzhou-06   | GQ258331 | ck/CH/LSD/08-5   |
| GQ844989 | Guilin-06      | GQ258332 | ck/CH/LSD/08-6   |
| GQ844990 | KD-08          | GQ258333 | ck/CH/LSD/08-7   |
| GQ844991 | Sichuan-06     | GQ258334 | ck/CH/LSD/08-8   |
| GQ844992 | Taian-03       | GQ258335 | ck/CH/LSD/08-9   |
| GQ258302 | ck/CH/LAH/08I  | GQ258336 | ck/CH/LSD/08I    |
| GQ258303 | ck/CH/LAH/08II | GQ258337 | ck/CH/LSD/08II   |
| GQ258304 | ck/CH/LCQ/08I  | GQ258338 | ck/CH/LSD/08III  |
| GQ258305 | ck/CH/LCQ/08II | GQ258339 | ck/CH/LSD/08IV   |
| GQ258306 | ck/CH/LDL/08I  | GQ258340 | ck/CH/LSD/08IX   |
| GQ229240 | 3370/05        | GQ258341 | ck/CH/LSD/08V    |
| GQ229241 | 3371/05        | GQ258342 | ck/CH/LSD/08VI   |
| GQ229242 | 3372/05        | GQ258343 | ck/CH/LSD/08VII  |
| GQ229243 | 3373/05        | GQ258344 | ck/CH/LSD/08VIII |
| GQ229244 | 3376/06        | GQ258345 | ck/CH/LSD/08X    |
| GQ229245 | 3381/06        | GQ258346 | ck/CH/LSD/08XI   |
| GQ229246 | 3384/06        | GQ258347 | ck/CH/LSD/08XII  |
| GQ229247 | 3385/06        | GQ229237 | 3339/05          |
| GQ265927 | DY07           | GQ229238 | 3368/05          |
| GQ265928 | DY05           | GQ229239 | 3369/05          |
| GQ265929 | FS08-1         | FJ599752 | HN/HL            |
| GQ265930 | FS08-2         | FJ426564 | SDZB0807         |
| GQ265931 | GM05           | FJ426565 | SDZB0808         |
| GQ265932 | GL08-1         | FJ345364 | ck/CH/LDL/07I    |
| GQ265933 | GL08-2         | FJ345365 | ck/CH/LDL/07III  |
| GQ265934 | HB08           | FJ345366 | ck/CH/LHLJ/07III |
| GQ265935 | SS06-1         | FJ345367 | ck/CH/LHLJ/07IV  |
| GQ265936 | SS07           | FJ345368 | ck/CH/LHLJ/07VI  |
| GQ265937 | SS06-2         | FJ345369 | ck/CH/LHLJ/07VII |
| GQ265938 | HN06-1         | FJ345370 | ck/CH/LHN/07I    |
| GQ265939 | HN06-2         | FJ345371 | ck/CH/LHN/07II   |
| GQ265940 | HN08           | FJ345372 | ck/CH/LHN/07III  |
| GQ265941 | HY06           | FJ345373 | ck/CH/LJL/07I    |
| GQ265942 | HY07           | FJ345374 | ck/CH/LJL/07II   |

|          |                 |          |                 |
|----------|-----------------|----------|-----------------|
| GQ265943 | LZ05            | FJ345375 | ck/CH/LJL/07III |
| GQ265944 | LZ07            | FJ345376 | ck/CH/LJS/07I   |
| GQ265945 | XX08            | FJ345377 | ck/CH/LJS/07II  |
| GQ265946 | NN07            | FJ345378 | ck/CH/LJS/07IV  |
| GQ265947 | TC07-1          | FJ345379 | ck/CH/LJS/07V   |
| GQ265948 | TC07-2          | FJ345380 | ck/CH/LLN/07I   |
| GQ265949 | ZX07            | FJ345381 | ck/CH/LSD/07-1  |
| GQ265950 | DY04            | FJ345382 | ck/CH/LSD/07-2  |
| GQ265951 | NN04            | FJ345383 | ck/CH/LSD/07-3  |
| GQ265952 | CQ04-1          | FJ345384 | ck/CH/LSD/07II  |
| GQ265953 | CQ04-2          | FJ345385 | ck/CH/LSD/07III |
| GQ154654 | HN/SG           | FJ345386 | ck/CH/LSD/07IV  |
| GQ154655 | H120            | FJ345387 | ck/CH/LSD/07IX  |
| FJ907238 | GX-YL5          | FJ345388 | ck/CH/LSD/07V   |
| FJ907239 | GX-NN7          | FJ210647 | SDZB0804        |
| FJ793938 | IBVSX2          | EU930426 | SDSG0801        |
| FJ793939 | IBVSX4          | EU930427 | SDTA06112       |
| FJ793940 | IBVSX8          | EU930428 | SDWF0711        |
| FJ793941 | IBVSX16         | EU930429 | SDWF0608        |
| EU930430 | SDLY0702        | DQ459475 | BJ03-1          |
| EU930431 | SDZB0803        | DQ459476 | CQ04-1          |
| EU930432 | SDZB0708        | DQ402364 | 3374/05         |
| EU930433 | SDPY0703        | AY772944 | BJ9601          |
| EU930434 | SDLY0701        | DQ167128 | ck/CH/LAH/03I   |
| EU930435 | SDTA06111       | DQ167129 | ck/CH/LAH/99I   |
| EU930436 | SDYT0605        | DQ167130 | ck/CH/LDL/01I   |
| EU930437 | SDJY0701        | DQ167131 | ck/CH/LDL/04II  |
| EU031525 | ck/CH/JS/06I    | DQ167132 | ck/CH/LDL/98I   |
| EU031526 | ck/CH/JS/06II   | DQ167133 | ck/CH/LGD/03I   |
| EU031527 | ck/CH/JS/06III  | DQ167134 | ck/CH/LGD/04II  |
| EU031528 | ck/CH/JS/07I    | DQ167135 | ck/CH/LGD/04III |
| EU031529 | ck/CH/JS/07II   | DQ167136 | ck/CH/LGD/96I   |
| EU031530 | ck/CH/JS/07III  | DQ167137 | ck/CH/LHB/96I   |
| EU031531 | ck/CH/JS/07V    | DQ167138 | ck/CH/LHLJ/02I  |
| EU857816 | SDLY0612        | DQ167139 | ck/CH/LHLJ/04V  |
| EU650418 | XG              | DQ167140 | ck/CH/LHLJ/04XI |
| EU563940 | ck/CH/LDL/07II  | DQ167141 | ck/CH/LHLJ/95I  |
| EU563941 | ck/CH/LSD/07I   | DQ167142 | ck/CH/LHLJ/99I  |
| EU563942 | ck/CH/LHLJ/07I  | DQ167143 | ck/CH/LHN/00I   |
| EU563943 | ck/CH/LHLJ/07V  | DQ167144 | ck/CH/LJL/04I   |
| EU563944 | ck/CH/LJL/07V   | DQ167145 | ck/CH/LLN/98I   |
| EF577030 | HH06            | DQ167146 | ck/CH/LSC/95I   |
| EF213558 | ck/CH/LDL05/III | DQ167147 | ck/CH/LSC/99I   |
| EF213559 | ck/CH/LDL/05II  | DQ167148 | ck/CH/LSD/03I   |

---

|          |                      |          |                 |
|----------|----------------------|----------|-----------------|
| EF213560 | ck/CH/LHLJ/05I       | DQ167149 | ck/CH/LSHH/03I  |
| EF213561 | ck/CH/LHLJ/06II 2008 | DQ167150 | ck/CH/LSHH/03II |
| EF213562 | ck/CH/LJL/05I        | DQ167151 | ck/CH/LTJ/95I   |
| EF213563 | ck/CH/LDL/05I        | DQ167152 | ck/CH/LXJ/02I   |
| EF213564 | ck/CH/LGS/06I        | DQ075323 | SH1             |
| EF213565 | ck/CH/LHLJ/05VI      | DQ075324 | SH2             |
| EF213566 | ck/CH/LLN/06I        | DQ072273 | SH5             |
| EF213567 | ck/CH/LNM/05I        | DQ072274 | SH6             |
| EF213568 | ck/CH/LSD/05I        | DQ069317 | SH3             |
| EF213580 | ck/CH/LGX/06I        | DQ069318 | SH4             |
| EF030996 | ck/CH/LDL/97I        | AY837465 | TA03            |
| AB274268 | TX94a                | AY775551 | HN99            |
| AB274269 | TX94b                | AY769993 | CQ/01/2004      |
| AB274270 | TX95                 | AY702970 | HN9604          |
| AB274271 | DB03                 | AY606314 | 2575/98         |
| DQ459472 | SC03-1               | AY606315 | T03/01          |
| DQ459473 | GD04-1               | AY606316 | 2993/02         |
| DQ459474 | YN05-01              | AY606317 | 3025/02         |
| AY606318 | 3051/02              | AF488350 | D971            |
| AY606319 | 3071/03              | AF395743 | 1/98            |
| AY606320 | TP/64                | AF395744 | 2/97            |
| AY606321 | 2296/95              | AF395745 | 3/97            |
| AY606322 | T07/02               | AY043221 | X               |
| AY606323 | 2992/02              | AY043312 | A2              |
| AY606324 | 2994/02              | AF352313 | ZJ971           |
| AY427818 | W93                  | AF250005 | A1171           |
| AY296742 | TW97-4               | AF274435 | DE072           |
| AY319302 | GX1-98               | AF250006 | A1211           |
| AY277632 | LD3                  | AF208239 | JS/95/03        |
| AY278246 | LS2                  | AF208240 | SD/97/01        |
| AY251816 | GX2-98               | AF210735 | JX/99/01        |
| AY251817 | HaN1-95              | AY237817 | SC021202        |

---
